# Supplementary material
Source: PubMed Central journal article supplement (PMC1544174)

**a**

5d

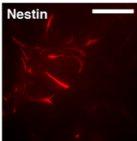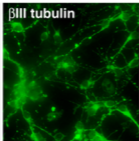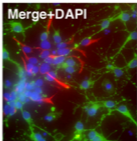**c**

5d

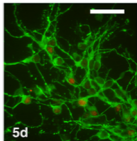 $\beta$ III tubulin / NeuN

10d

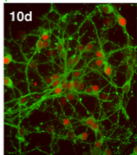**b**

10d

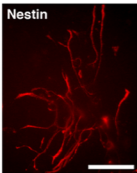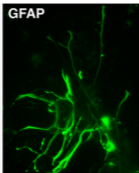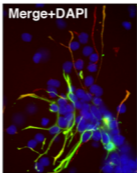

Supplement: pnas_0510926103_1.pdf [file pnas_0510926103_1.pdf]
